# Supplementary material for: Adaption of the structure of carbon nanohybrids toward high-relaxivity for a new MRI contrast agent
Source: Royal Society of Chemistry journal article supplement (doi:10.1039/c6ra06733f), 2016-01-01
Supplement: c6ra06733f1.pdf [file c6ra06733f1.pdf]

## Supporting Information

# The Adaptive Structure of Carbon Nanohybrids toward High-Relaxivity for the New MRI Contrast Agent

Juan Li‡, Rongli Cui‡, Yanan Chang, Xihong Guo, Weihong Gu, Huan Huang, Kui Chen,

Guoming Lin, Jinquan Dong, Gengmei Xing\*, Baoyun Sun\*

CAS Key Laboratory for Biomedical Effects of Nanomaterial & Nanosafety, Institute of High

Energy Physics, Chinese Academy of Science (CAS), Beijing 100049, China

E-mail: sunby@ihep.ac.cn, xinggm@ihep.ac.cn

‡ These authors contributed equally to this work

### Raman spectra of GO-Gd@C<sub>82</sub> nanohybrids

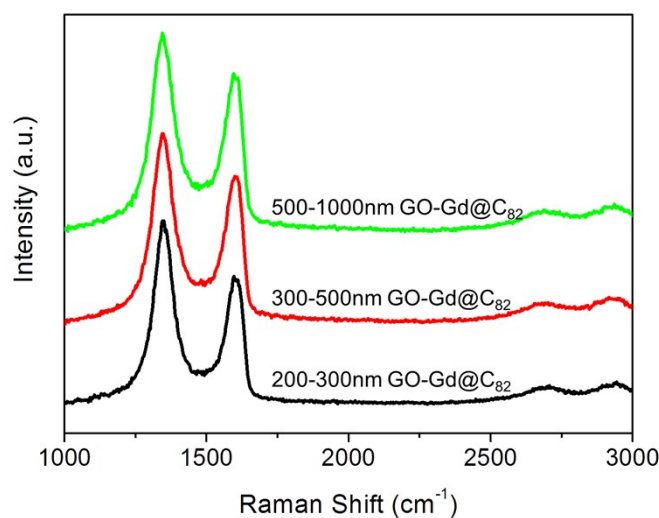

**Fig. S1** Raman spectra of as-prepared GO-Gd@C<sub>82</sub> nanohybrids with different size of GO.

## AFM and SEM images of GO film on glass

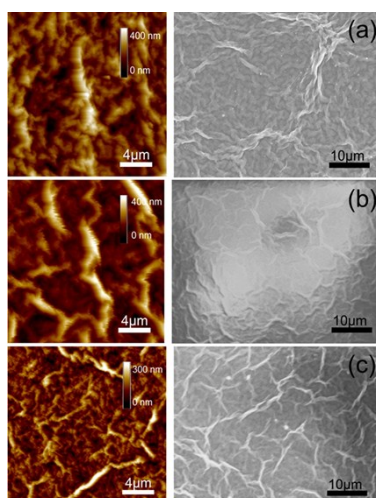

**Fig. S2** AFM and SEM images of GO film on glass with different size GO. (a) 200-300nm, (b) 300-500nm, (c) 500-1000nm

**Table S1.** Reduction potential and oxidation potential for Gd@C<sub>82</sub> and Gd@C<sub>82</sub>PCBM

| E vs Fc/Fc <sup>+</sup> | E <sub>ox1</sub> (V) | E <sub>red1</sub> (V) |
|-------------------------|----------------------|-----------------------|
| Gd@C <sub>82</sub>      | 0.1835               | -0.4385               |
| Gd@C <sub>82</sub> PCBM | 0.127                | -0.473                |

The potentials were measured in a mixed solvent of o-DCB/MeCN (4:1 v/v) with 0.1 M TBAClO<sub>4</sub> as supporting electrolyte at a scan rate of 100 mV s<sup>-1</sup> versus Ag/Ag<sup>+</sup> quasi-reference electrode and standardized to Fc/Fc<sup>+</sup> couple
